# Supplementary material for: Time and age dependent decrease of NT-proBNP after septal myectomy in hypertrophic obstructive cardiomyopathy
Source: publisher site journal article supplement (doi:10.1515/cclm-2016-1047), 2017-01-01
Supplement: Supplementary file 1 [file supplemental_materials.doc]

Table S1. Relationship of log NT-proBNP to clinical and echocardiographic parameters

| Parameters | Spearman ρ | p value |
| --- | --- | --- |
| Age (years) | -0.028 | 0.709 |
| Male gender | -0.423 | <0.001 |
| Diameter of aortic annulus (mm) | -0.217 | 0.003 |
| Diameter of aortic sinus (mm) | -0.283 | <0.001 |
| Diameter of ascending aorta (mm) | -0.147 | 0.049 |
| Diameter of left atrium (mm) | 0.148 | 0.048 |
| Diameter of left ventricle (mm) | -0.154 | 0.039 |
| Diameter of right ventricle (mm) | -0.149 | 0.046 |
| Diameter of main pulmonary artery (mm) | 0.073 | 0.336 |
| Representative thickness of septum (mm) | 0.277 | <0.001 |
| Maximum thickness of septum (mm) | 0.262 | <0.001 |
| Thickness of posterior wall (mm) | 0.259 | <0.001 |
| EF of left ventricle (%) | 0.013 | 0.861 |
| Resting gradient of LVOT (mmHg) | 0.169 | 0.023 |
| Concomitant cardiac disease needing surgical intervention | 0.041 | 0.587 |
| Mitral problem needing surgical intervention | -0.031 | 0.675 |
| Tricuspid problem needing surgical intervention | 0.061 | 0.414 |
| Coronary problem needing surgical intervention | -0.064 | 0.391 |
| Evidenced atrial fibrillation | 0.129 | 0.083 |

Table S2. Relationship of Δlog NT-proBNP to baseline and follow-up parameters

| Parameter | Spearman ρ | p value |
| --- | --- | --- |
| Male gender | 0.102 | 0.172 |
| Age (years) | -0.302 | <0.001 |
| Preoperative log NT-proBNP | -0.167 | 0.024 |
| Mitral operation | -0.010 | 0.895 |
| Tricuspid operation | -0.187 | 0.011 |
| Coronary operation | 0.050 | 0.500 |
| Atrial fibrillation ablation | -0.165 | 0.026 |
| Log (Follow-up days) | -0.271 | <0.001 |
| ΔDiameter of aortic annulus (%) | -0.182 | 0.021 |
| ΔDiameter of aortic sinus (%) | -0.208 | 0.008 |
| ΔDiameter of ascending aorta (%) | -0.210 | 0.008 |
| ΔDiameter of left atrium (%) | 0.032 | 0.682 |
| ΔDiameter of left ventricle (%) | 0.178 | 0.023 |
| ΔDiameter of right ventricle (%) | -0.019 | 0.809 |
| ΔDiameter of main pulmonary artery (%) | 0.032 | 0.688 |
| ΔRepresentative thickness of septum (%) | -0.019 | 0.814 |
| ΔThickness of posterior wall (%) | 0.161 | 0.040 |
| ΔEF of left ventricle (%) | 0.034 | 0.672 |
| ΔLVOT (%) | 0.112 | 0.183 |
